# Supplementary material
Source: publisher site journal article supplement (https://www.dovepress.com/article/338936)
Supplement: Supplementary file 1 [file get_supplementary_file.php]

**Appendix 1. Preferences for two forms of family intervention delivery**

Preference for WeChat-based family intervention

1. Are you willing to follow the WeChat Official Accounts (WOA) on schizophrenia management and get knowledge on schizophrenia and skills on caregiving?

(1) Yes (2) No

2. Are you willing to join the caregiver WeChat chatting group and interact with other caregivers of people living with schizophrenia to exchange information and provide mutual support?

(1) Yes (2) No

3. Are you willing to add a psychiatrist's WeChat friend, and have online consultations with the psychiatrist through WeChat video call?

(1) Yes (2) No

Preference for Hospital-based family intervention

1. Are you willing to attend lectures on schizophrenia and its management held in the hospital to get knowledge on schizophrenia and skills on caregiving?

(1) Yes (2) No

2. Are you willing to join the mutual-support group organized by the hospital and interact face-to-face with other caregivers?

(1) Yes (2) No

3. Are you willing to have a psychiatrist to conduct home visits to your house to answer your questions and concerns and provide professional guidance and support?

(1) Yes (2) No
